# Supplementary material
Source: ML conference proceedings conference paper supplement (https://openreview.net/forum?id=qk6AxjhFVR)
Supplement: supplementary_material [file attachment]

# NESTLE: AN EFFICIENT AND ROBUST DATA VALUATION FRAMEWORK FOR LARGE LANGUAGE MODELS

**Anonymous authors**

Paper under double-blind review

## A APPENDIX

### A.1 DATASET DESCRIPTION

We evaluated the effectiveness of the method using the Finance<sup>1</sup>, Healthcare<sup>2</sup>, Law<sup>3</sup>, Consult<sup>4</sup>, Medicine<sup>5</sup>, and TCM<sup>6</sup> datasets. The Finance dataset contains 53.9k financial records, Healthcare contains 112k medical records, Law contains 9.2k legal records, Consult contains 549k medical consultation records, Medicine contains 20k Western medicine records, and TCM contains 113k traditional Chinese medicine records. We randomly selected 1000 entries as the target domain dataset.

### A.2 CONTRIBUTION ANALYSIS IN COOPERATIVE GAMES

In order to extensively validate the efficacy of our model, we also estimated the contributions of participants in a cooperative game using Qwen1.5 and ChatGLM3. The experimental results are shown in Table 1 and Table 2. It can be observed that, for other models, the ranking of participant contributions is consistent with other performance metrics. Notably, due to the variability in metric evaluations, it is notable that evaluations on Qwen1.5 exhibit discrepancies specifically in the ROUGE-1, which also demonstrates the superior robustness of our method.

Table 1: Evaluation of participant contributions in cooperative games using the ChatGLM3-6B model. ( $P_i$  denotes the  $i$  provider.)

| Multi-Source<br>Cooperative Setting |       | Ground-truth Shapley value |         |         |         | OURS   |
|-------------------------------------|-------|----------------------------|---------|---------|---------|--------|
|                                     |       | BLEU-4                     | ROUGE-1 | ROUGE-2 | ROUGE-L |        |
| $C_1$                               | $P_1$ | 0.2963                     | 0.3043  | 0.2849  | 0.3086  | 0.3056 |
|                                     | $P_2$ | 0.3250                     | 0.3312  | 0.3314  | 0.3217  | 0.3324 |
|                                     | $P_3$ | 0.3785                     | 0.3644  | 0.3835  | 0.3696  | 0.3619 |
| $C_2$                               | $P_1$ | 0.3203                     | 0.3242  | 0.3288  | 0.3220  | 0.3294 |
|                                     | $P_2$ | 0.3308                     | 0.3266  | 0.3254  | 0.3286  | 0.3232 |
|                                     | $P_3$ | 0.3488                     | 0.3491  | 0.3456  | 0.3492  | 0.3473 |
| $C_3$                               | $P_1$ | 0.3255                     | 0.3105  | 0.3186  | 0.3101  | 0.3111 |
|                                     | $P_2$ | 0.3308                     | 0.3334  | 0.3281  | 0.3377  | 0.3276 |
|                                     | $P_3$ | 0.3435                     | 0.3561  | 0.3533  | 0.3521  | 0.3613 |
| $C_4$                               | $P_1$ | 0.3634                     | 0.3679  | 0.3508  | 0.3805  | 0.3544 |
|                                     | $P_2$ | 0.3183                     | 0.3160  | 0.3245  | 0.3097  | 0.3228 |
|                                     | $P_3$ | 0.3183                     | 0.3160  | 0.3245  | 0.3097  | 0.3228 |

<sup>1</sup>[https://huggingface.co/datasets/4DR1455/finance\\_questions](https://huggingface.co/datasets/4DR1455/finance_questions)

<sup>2</sup><https://huggingface.co/datasets/wangrongsheng/HealthCareMagic-100k-en>

<sup>3</sup><https://huggingface.co/datasets/Alignment-Lab-AI/Lawyer-Instruct>

<sup>4</sup>[https://huggingface.co/datasets/michaelwzhu/ChatMed\\_Consult\\_Dataset](https://huggingface.co/datasets/michaelwzhu/ChatMed_Consult_Dataset)

<sup>5</sup><https://github.com/CMKRG/QiZhenGPT>

<sup>6</sup>[https://huggingface.co/datasets/michaelwzhu/ShenNong\\_TCM\\_Dataset](https://huggingface.co/datasets/michaelwzhu/ShenNong_TCM_Dataset)

054  
055  
056  
057  
058  
059  
060  
061  
062  
063  
064  
065  
066  
067  
068  
069  
070  
071  
072  
073  
074  
075  
076  
077  
078  
079  
080  
081  
082  
083  
084  
085  
086  
087  
088  
089  
090  
091  
092  
093  
094  
095  
096  
097  
098  
099  
100  
101  
102  
103  
104  
105  
106  
107

Table 2: Evaluation of participant contributions in cooperative games using the Qwen1.5-7B model. ( $P_i$  denotes the  $i$  provider.)

| Mulri-Source<br>Cooperative Setting |       | Ground-truth Shapley value |         |         |         | OURS   |
|-------------------------------------|-------|----------------------------|---------|---------|---------|--------|
|                                     |       | BLEU-4                     | ROUGE-1 | ROUGE-2 | ROUGE-L |        |
| $C_1$                               | $P_1$ | 0.3250                     | 0.3233  | 0.3215  | 0.3250  | 0.2973 |
|                                     | $P_2$ | 0.3321                     | 0.3367  | 0.3334  | 0.3309  | 0.3404 |
|                                     | $P_3$ | 0.3428                     | 0.3398  | 0.3450  | 0.3438  | 0.3623 |
| $C_2$                               | $P_1$ | 0.3129                     | 0.3131  | 0.3075  | 0.3186  | 0.2910 |
|                                     | $P_2$ | 0.3333                     | 0.3138  | 0.3385  | 0.3362  | 0.3409 |
|                                     | $P_3$ | 0.3536                     | 0.3729  | 0.3539  | 0.3450  | 0.3681 |
| $C_3$                               | $P_1$ | 0.3282                     | 0.3245  | 0.3219  | 0.3260  | 0.3173 |
|                                     | $P_2$ | 0.3342                     | 0.3271  | 0.3313  | 0.3258  | 0.3389 |
|                                     | $P_3$ | 0.3375                     | 0.3483  | 0.3467  | 0.3482  | 0.3436 |
| $C_4$                               | $P_1$ | 0.3341                     | 0.3297  | 0.3432  | 0.3394  | 0.3645 |
|                                     | $P_2$ | 0.3329                     | 0.3351  | 0.3284  | 0.3302  | 0.3177 |
|                                     | $P_3$ | 0.3329                     | 0.3351  | 0.3284  | 0.3302  | 0.3177 |
